# Supplementary material for: Social and anthropometric factors explaining racial/ethnical differences in birth weight in the United States
Source: PubMed Central journal article supplement (PMC5399358; doi:10.1038/srep46657), 2017-04-21
Supplement: srep46657-s1.pdf [file srep46657-s1.pdf]

Appendix 1: Average Birth Weight Difference in Grams of 14 Races Compared to White Infants. Analysis of Singleton Births in the United States, 2009–2012.

|                 | Crude Estimate  | Additionally adjusted for gestational age | Additionally adjusted for maternal age and parity | Additionally adjusted for height and BMI | Additionally adjusted for gestational weight gain | Additionally adjusted for socio-economic and behavioral factors |
|-----------------|-----------------|-------------------------------------------|---------------------------------------------------|------------------------------------------|---------------------------------------------------|-----------------------------------------------------------------|
| Japanese        | -289            | -310                                      | -313                                              | -173                                     | -115                                              | -124                                                            |
| 95% CI          | [-302 - -275]** | [-321 - -298]**                           | [-325 - -302]**                                   | [-184 - -162]**                          | [-126 - -104]**                                   | [-135 - -114]**                                                 |
| Filipino        | -252            | -210                                      | -219                                              | -122                                     | -112                                              | -118                                                            |
| 95% CI          | [-257 - -247]** | [-214 - -206]**                           | [-223 - -214]**                                   | [-126 - -117]**                          | [-116 - -108]**                                   | [-122 - -114]**                                                 |
| Black           | -244            | -169                                      | -168                                              | -183                                     | -175                                              | -150                                                            |
| 95% CI          | [-246 - -243]** | [-170 - -168]**                           | [-170 - -167]**                                   | [-184 - -182]**                          | [-176 - -174]**                                   | [-151 - -149]**                                                 |
| Asian Indian    | -238            | -236                                      | -228                                              | -165                                     | -138                                              | -149                                                            |
| 95% CI          | [-241 - -235]** | [-238 - -233]**                           | [-230 - -225]**                                   | [-167 - -162]**                          | [-141 - -136]**                                   | [-151 - -147]**                                                 |
| Vietnamese      | -220            | -199                                      | -208                                              | -52                                      | -34                                               | -38                                                             |
| 95% CI          | [-225 - -215]** | [-204 - -195]**                           | [-213 - -204]**                                   | [-56 - -47]**                            | [-38 - -30]**                                     | [-42 - -34]**                                                   |
| Guamanian       | -153            | -102                                      | -117                                              | -53                                      | -57                                               | -43                                                             |
| 95% CI          | [-189 - -118]** | [-133 - -72]**                            | [-146 - -87]**                                    | [-82 - -24]**                            | [-86 - -29]**                                     | [-71 - -14]**                                                   |
| Chinese         | -131            | -147                                      | -146                                              | -35                                      | -16                                               | -24                                                             |
| 95% CI          | [-134 - -127]** | [-150 - -144]**                           | [-149 - -143]**                                   | [-38 - -32]**                            | [-19 - -13]**                                     | [-26 - -21]**                                                   |
| Hawaiian        | -56             | -24                                       | -34                                               | -32                                      | -31                                               | -30                                                             |
| 95% CI          | [-142 - 31]     | [-98 - 49]                                | [-106 - 38]                                       | [-103 - 38]                              | [-101 - 38]                                       | [-99 - 39]                                                      |
| Puerto Rican    | -158            | -117                                      | -116                                              | -86                                      | -86                                               | -67                                                             |
| 95% CI          | [-165 - -152]** | [-123 - -112]**                           | [-122 - -111]**                                   | [-91 - -80]**                            | [-91 - -81]**                                     | [-72 - -62]**                                                   |
| Korean          | -109            | -140                                      | -142                                              | -46                                      | -18                                               | -28                                                             |
| 95% CI          | [-115 - -102]** | [-146 - -135]**                           | [-148 - -137]**                                   | [-51 - -41]**                            | [-23 - -13]**                                     | [-33 - -22]**                                                   |
| Mexican         | -64             | -42                                       | -49                                               | -5                                       | 12                                                | 20                                                              |
| 95% CI          | [-65 - -63]**   | [-43 - -41]**                             | [-50 - -48]**                                     | [-6 - -4]**                              | [11 - 13]**                                       | [19 - 21]**                                                     |
| Cuban           | -49             | 8                                         | 15                                                | 44                                       | 32                                                | 62                                                              |
| 95% CI          | [-57 - -42]**   | [2 - 15]**                                | [9 - 21]**                                        | [38 - 51]**                              | [26 - 38]**                                       | [57 - 68]**                                                     |
| American Indian | -14             | 29                                        | 26                                                | 17                                       | 25                                                | 49                                                              |
| 95% CI          | [-20 - -8]**    | [24 - 35]**                               | [20 - 31]**                                       | [11 - 22]**                              | [20 - 30]**                                       | [44 - 54]**                                                     |
| Samoan          | 126             | 156                                       | 136                                               | 42                                       | -1                                                | 3                                                               |
| 95% CI          | [104 - 147]**   | [138 - 174]**                             | [118 - 154]**                                     | [24 - 59]**                              | [-18 - 16]                                        | [-14 - 20]                                                      |

BMI: body mass index, 95% CI: 95% confidence interval \*  $P < 0.05$ ; \*\*  $P < 0.01$

Appendix 2. Average Birth Weight Z-Score Difference of 14 Races Compared to White Infants. Analysis of Singleton Births in the United States, 2009–2012.

|                 | Crude Estimate    | Additionally adjusted for maternal age and parity | Additionally adjusted for height and BMI | Additionally adjusted for gestational weight gain | Additionally adjusted for socio-economic and behavioral factors |
|-----------------|-------------------|---------------------------------------------------|------------------------------------------|---------------------------------------------------|-----------------------------------------------------------------|
| Japanese        | -0.69             | -0.70                                             | -0.37                                    | -0.24                                             | -0.29                                                           |
| 95% CI          | [-0.71 - -0.66]** | [-0.72 - -0.68]**                                 | [-0.39 - -0.34]**                        | [-0.26 - -0.22]**                                 | [-0.31 - -0.27]**                                               |
| Asian Indian    | -0.52             | -0.50                                             | -0.35                                    | -0.29                                             | -0.34                                                           |
| 95% CI          | [-0.52 - -0.51]** | [-0.51 - -0.50]**                                 | [-0.35 - -0.34]**                        | [-0.29 - -0.28]**                                 | [-0.34 - -0.33]**                                               |
| Filipino        | -0.45             | -0.47                                             | -0.23                                    | -0.20                                             | -0.24                                                           |
| 95% CI          | [-0.45 - -0.44]** | [-0.48 - -0.46]**                                 | [-0.24 - -0.22]**                        | [-0.21 - -0.19]**                                 | [-0.25 - -0.24]**                                               |
| Vietnamese      | -0.44             | -0.47                                             | -0.09                                    | -0.04                                             | -0.08                                                           |
| 95% CI          | [-0.45 - -0.43]** | [-0.47 - -0.46]**                                 | [-0.10 - -0.08]**                        | [-0.05 - -0.03]**                                 | [-0.09 - -0.07]**                                               |
| Black           | -0.37             | -0.37                                             | -0.40                                    | -0.38                                             | -0.37                                                           |
| 95% CI          | [-0.37 - -0.37]** | [-0.37 - -0.37]**                                 | [-0.40 - -0.40]**                        | [-0.38 - -0.38]**                                 | [-0.37 - -0.36]**                                               |
| Chinese         | -0.32             | -0.32                                             | -0.06                                    | -0.02                                             | -0.05                                                           |
| 95% CI          | [-0.33 - -0.32]** | [-0.33 - -0.31]**                                 | [-0.06 - -0.05]**                        | [-0.02 - -0.01]**                                 | [-0.06 - -0.04]**                                               |
| Korean          | -0.31             | -0.32                                             | -0.09                                    | -0.03                                             | -0.07                                                           |
| 95% CI          | [-0.32 - -0.30]** | [-0.33 - -0.30]**                                 | [-0.10 - -0.08]**                        | [-0.04 - -0.02]**                                 | [-0.08 - -0.06]**                                               |
| Guamanian       | -0.24             | -0.27                                             | -0.11                                    | -0.10                                             | -0.10                                                           |
| 95% CI          | [-0.29 - -0.19]** | [-0.32 - -0.21]**                                 | [-0.16 - -0.05]**                        | [-0.15 - -0.05]**                                 | [-0.16 - -0.05]**                                               |
| Puerto Rican    | -0.19             | -0.19                                             | -0.11                                    | -0.12                                             | -0.12                                                           |
| 95% CI          | [-0.20 - -0.19]** | [-0.19 - -0.18]**                                 | [-0.12 - -0.11]**                        | [-0.13 - -0.11]**                                 | [-0.13 - -0.11]**                                               |
| Hawaiian        | -0.13             | -0.15                                             | -0.12                                    | -0.10                                             | -0.10                                                           |
| 95% CI          | [-0.25 - 0.00]    | [-0.28 - -0.03]*                                  | [-0.24 - 0.01]                           | [-0.23 - 0.02]                                    | [-0.23 - 0.03]                                                  |
| Mexican         | -0.09             | -0.10                                             | 0.01                                     | 0.05                                              | 0.03                                                            |
| 95% CI          | [-0.09 - -0.08]** | [-0.10 - -0.10]**                                 | [0.01 - 0.01]**                          | [0.04 - 0.05]**                                   | [0.03 - 0.04]**                                                 |
| Cuban           | -0.03             | -0.02                                             | 0.05                                     | 0.03                                              | 0.02                                                            |
| 95% CI          | [-0.04 - -0.02]** | [-0.03 - -0.01]**                                 | [0.04 - 0.06]**                          | [0.02 - 0.04]**                                   | [0.01 - 0.03]**                                                 |
| American Indian | 0.02              | 0.01                                              | 0.01                                     | 0.03                                              | 0.08                                                            |
| 95% CI          | [0.01 - 0.03]**   | [0.00 - 0.02]**                                   | [-0.00 - 0.02]                           | [0.02 - 0.04]**                                   | [0.07 - 0.09]**                                                 |
| Samoan          | 0.31              | 0.28                                              | 0.06                                     | -0.04                                             | -0.03                                                           |
| 95% CI          | [0.28 - 0.35]**   | [0.24 - 0.31]**                                   | [0.02 - 0.09]**                          | [-0.07 - -0.00]*                                  | [-0.07 - 0.00]                                                  |

BMI: body mass index, 95% CI: 95% confidence interval \*  $P < 0.05$ ; \*\*  $P < 0.01$
